# Supplementary material for: Efficacy and safety of abobotulinumtoxinA in spastic lower limb: Randomized trial and extension
Source: PubMed Central journal article supplement — Neurology. 2017 Nov 28;89(22):2245–53. doi: 10.1212/WNL.0000000000004687 (PMC5705248; doi:10.1212/wnl.0000000000004687), 2017-11-28
Supplement: supp_WNL.0000000000004687_Supplementary_Material.pdf [file supp_WNL.0000000000004687_Supplementary_Material.pdf]

## **e-Methods**

### **Treatment**

A total volume of 7.5 mL of the reconstituted product for any abobotulinumtoxinA dose or placebo was injected. A 2.5 mL volume was injected into the soleus muscle in a minimum of three injection sites, 1.5 mL was injected into the gastrocnemius muscle in a minimum of two injection sites and the remainder of the dose was injected into at least one other lower muscle selected by the investigator.

### **Retreatment**

Retreatment was possible at intervals  $\geq 12$  weeks. Need for retreatment was decided by the investigator on the basis of MAS score in the GSC (decrease from baseline  $< 1$  grade), the physician-rated clinical benefit and tolerance of the previous injection. Participants not retreated at week 12 were followed-up every 4 weeks until they required retreatment or until they had completed at least 12 months of treatment (for a total treatment duration of 15 months in the open-label phase).

### **Analysis of binding and neutralizing antibodies**

Serum antibodies to botulinum toxin A were measured with a radioimmunoprecipitation assay and positive samples were tested for neutralizing antibodies with the mouse protection assay.

### **Double-blind study randomization**

Computer-generated randomization lists were created by an independent sponsor statistician and assigned via a 24-hour interactive voice system from an external contract research organization. A double-dummy technique was used for participant

and investigator blinding. Each treatment pack contained either three abobotulinumtoxinA 500 U vials, two vials abobotulinumtoxinA 500 U and one placebo vial, or three placebo vials. Packs and reconstitution procedure in each group were identical in appearance.

### **Two-step Hochberg method**

Step 1: The superiority of each abobotulinumtoxinA dose to placebo was tested at a significance level of 0.05. Step 2: If the higher of the two unadjusted  $p$  values was  $<0.05$ , the superiority of the two abobotulinumtoxinA doses to placebo was demonstrated. If the higher was  $\geq 0.05$ , the associated abobotulinumtoxinA dose was considered not superior to placebo and the lower unadjusted  $p$  value was compared with 0.025. If it was  $<0.025$ , the superiority of the associated abobotulinumtoxinA dose to placebo was demonstrated.

### **Pooling of centers**

A center that had recruited fewer than six subjects was considered as a small center and pooled with another center, given the strategy below:

- If there was a small center in at least one of the single center countries, then it was pooled with the center of the closest other single center countries (geographic proximity)
- If there was only one small center in a multiple-center country, then it was pooled with the center within the same country having the closest to six recruited subjects
- If there were two small centers in a multiple-center country, then the two small centers within the country were pooled

- If there were more than two small centers in a multiple-center country, then the following 2-step procedure was applied:
  - Step 1: the smallest centers were pooled until the pooled centers reached the threshold of six recruited subjects. If there were no more small centers, the procedure was stopped. Otherwise, Step 2 was applied.
  - Step 2: if there was at least one remaining small center, the following approach was applied: (a) If there was one remaining small center then it was pooled with the center within the same country having the closest to six recruited subjects and the procedure was stopped (b) If there were two remaining small centers then the two small centers within the country were pooled and the procedure was stopped (c) If there were more than two remaining small centers then Step 1 was reiterated.

In the planned analysis of MAS scores at week 4, a significant randomized treatment by center interaction was observed. To investigate the nature of the interaction, treatment effects and standard errors by center for the 1500 U versus placebo and 1000 U versus placebo comparisons were calculated and displayed in a Galbraith plot with 99.5% confidence bounds. Centers falling outside the confidence bounds were identified as potential influential outliers. An additional exploratory analysis of MAS scores at week 4 excluding participants from centers considered as outliers was conducted (e-Results).

## **e-Results**

### **Efficacy of a single injection: post-hoc analysis of primary efficacy endpoint**

A post-hoc analysis of the primary efficacy endpoint (MAS was change from baseline in GSC muscle tone [MAS knee extended] after 4 weeks) was performed using a rank transform and a proportional odds model to address any concern regarding possible lack of normality in the data. Results from this were consistent with those obtained from the ANCOVA ( $p = 0.2348$  and  $p = 0.0039$  respectively for ABO 1000 U and ABO 1500 U).

### **Efficacy of a single injection: exploratory analysis of primary efficacy endpoint to investigate the effect of treatment by center**

Treatment by center interaction had a significant effect on the mean changes in the MAS score in the ITT population from baseline at week 4 ( $p = 0.0046$ ); however, an exploratory analysis excluding participants considered as outliers supported the conclusion that abobotulinumtoxinA 1500 U was superior to placebo at reducing GSC muscle tone at week 4. When these centers were excluded, the treatment by center interaction was non-significant ( $p = 0.3426$ ). The corresponding LS mean changes (95% CI) were  $-0.5$  ( $-0.6$  to  $-0.3$ ) for placebo,  $-0.5$  ( $-0.7$  to  $-0.4$ ) for abobotulinumtoxinA 1000 U and  $-0.8$  ( $-0.9$  to  $-0.6$ ) for abobotulinumtoxinA 1500 U ( $p = 0.0042$ ) supporting the conclusion that abobotulinumtoxinA 1500 U was superior to placebo at reducing muscle tone in the GSC at week 4.

### **Efficacy of a single injection: proportional odds ratio analysis of PGA score**

To check the robustness of the rank ANCOVA analysis, a proportional odds ratio analysis was applied to the ordered PGA categorical responses. An odds ratio  $>1$  for

abobotulinumtoxinA versus placebo indicates a positive treatment effect in favor of abobotulinumtoxinA, and an odds ratio  $<1$  indicates a treatment effect in favor of placebo. When applied to the week 4 data, the odds ratio for abobotulinumtoxinA 1000 U versus placebo was 1.66 (95% CI 1.03–2.66;  $p = 0.0368$ ) and for abobotulinumtoxinA 1500 U versus placebo it was 1.70 (95% CI 1.06–2.74;  $p = 0.0282$ ).

### **Efficacy of a single injection: spasticity, active range of dorsiflexion and quality of life**

Spasticity grades (Y) were reduced in the GSC and soleus at week 4 and the angle of catch ( $X_{V3}$ ) was improved at week 1 (GSC) and week 4 (soleus) for both abobotulinumtoxinA doses versus placebo. No difference was observed for the angle of arrest ( $X_{V1}$ ). The change in the active range of ankle dorsiflexion with knee extended was  $3.7^\circ$  (95% CI 2.0–5.3) with abobotulinumtoxinA 1500 U and  $1.5^\circ$  ( $-0.2$  to  $3.1$ ) with abobotulinumtoxinA 1000 U, versus  $1.6^\circ$  ( $-0.1$ – $3.2$ ) with placebo ( $p = 0.07$  for 1500 U and  $p = 0.94$  for 1000 U vs placebo). Other changes are displayed in Table e-2. No changes occurred in SF-36 or EQ-5D between the three groups.

### **Effects of repeated injections: spasticity, active range of dorsiflexion and quality of life**

The reductions in spasticity grade (Y) observed in the double-blind study stabilized by cycle 1 week 4. Increases in angle of arrest ( $X_{V1}$ ) in the GSC across cycles stabilized by cycle 2 week 4, while  $X_{V3}$  continued to increase up to  $+9.5^\circ$  at cycle 4 week 4, with similar findings in the soleus (Table e-2 and figure e-1). The active range of ankle dorsiflexion with the knee extended continued to increase across

cycles, with an improvement of +6.5° from baseline to cycle 4 week 4 and similar results against the soleus (Table e-2 and figure e-1).

Correlation between composite  $X_A$  ( $X_A$  against GSC +  $X_A$  against soleus) and comfortable barefoot walking speed was significant at most endpoints (Table e-8), with composite  $X_A$  explaining about a quarter of the variance in walking speed.

### **Effects of repeated injections: walking speed**

By cycle 4 week 4, mean (standard deviation) change from baseline in participants experiencing an event within 0–2 years was 0.12 m/s (0.17) versus 0.06 m/s (0.15) for participants experiencing events >10 years prior to study (Table e-7). Among the 136 participants treated for four cycles, at baseline 0% walked >0.8 m/s, 52% walked 0.4–0.8 m/s and 48% walked <0.4 m/s. At cycle 4 last visit, 16% reached a walking speed  $\geq$ 0.8 m/s, 41% walked 0.4–0.8 m/s and 43% <0.4 m/s. Only 14% of participants receiving concomitant physiotherapy reached >0.8 m/s at cycle 4 last visit versus 20% of participants not receiving physiotherapy; however, 53% of those receiving physiotherapy walked <0.4 m/s at baseline versus 39% who did not.

### **Safety: muscular weakness**

In the double-blind study, all muscular weakness episodes in the placebo and abobotulinumtoxinA 1000 U groups were local. In the abobotulinumtoxinA 1500 U group (128 injections), there were two cases of local muscular weakness, three cases of regional weakness (bilateral leg n = 2, shoulder n = 1) and three cases of generalized muscle weakness. During the open-label extension, there were 44 cases of muscular weakness relative to 1005 injections (23 localized and 21 generalized events).

### **Safety: remote toxin spread**

Of the five serious adverse events suggestive of remote spread effects in four participants treated with abobotulinumtoxinA 1500 U, the three cases of generalized muscle weakness and one case of dysphagia occurred during Cycle 1; one case of dysphagia occurred during Cycle 2 and the participant suffered a myocardial infarction later in the same cycle. These events were mild or moderate in intensity except one case of severe generalized muscle weakness. All four participants recovered from the events in the same treatment cycle they occurred.

### **Assessment of binding and neutralizing antibodies**

Two participants in the placebo group, one participant in the abobotulinumtoxinA 1000 U group and one participant in the abobotulinumtoxinA 1500 U group had binding antibodies at baseline; both placebo recipients and the abobotulinumtoxinA 1000 U recipient were also positive for neutralizing antibodies at baseline. Only the participant assigned to receive abobotulinumtoxinA 1000 U had not been previously treated with botulinum toxin type A.

**Table e-1. Doses of abobotulinumtoxinA administered to each muscle group across cycles, with total dose administered in the lower limb only**

| Muscle group                              | Dose injected (U) |                    |                    |                    |                    |
|-------------------------------------------|-------------------|--------------------|--------------------|--------------------|--------------------|
|                                           | Double-blind      | Open-label         |                    |                    |                    |
| Dose Group/statistic                      |                   | Cycle 1            | Cycle 2            | Cycle 3            | Cycle 4            |
| <b>Ankle plantar flexor muscle groups</b> |                   |                    |                    |                    |                    |
| <b>Medial gastrocnemius</b>               |                   |                    |                    |                    |                    |
| <b>ABO 1000 U</b>                         |                   |                    |                    |                    |                    |
| Mean (range)                              | 122.5<br>(67–200) | 136.7<br>(100–200) | 142.9<br>(93–300)  | 132.0<br>(93–300)  | 123.7<br>(67–200)  |
| n (%)                                     | 125 (98.4)        | 10 (100.0)         | 64 (98.5)          | 35 (100.0)         | 21 (100.0)         |
| <b>ABO 1500 U</b>                         |                   |                    |                    |                    |                    |
| Mean (range)                              | 183.5<br>(0–300)  | 174.4<br>(100–300) | 174.7<br>(100–304) | 171.8<br>(100–300) | 168.2<br>(100–300) |
| n (%)                                     | 127 (99.2)        | 333 (99.4)         | 232 (100.0)        | 186 (98.4)         | 115 (97.5)         |
| <b>Lateral gastrocnemius</b>              |                   |                    |                    |                    |                    |
| <b>ABO 1000 U</b>                         |                   |                    |                    |                    |                    |
| Mean (range)                              | 95.2<br>(67–200)  | 113.3<br>(67–200)  | 97.7<br>(67–200)   | 85.9<br>(67–150)   | 89.0<br>(67–150)   |
| n (%)                                     | 108 (85.0)        | 10 (100.0)         | 61 (93.8)          | 33 (94.3)          | 21 (100.0)         |



| Muscle group              | Dose injected (U)       |                    |                    |                    |                    |
|---------------------------|-------------------------|--------------------|--------------------|--------------------|--------------------|
|                           | Dose<br>Group/statistic | Double-<br>blind   | Open-label         |                    |                    |
| Cycle 1                   |                         |                    | Cycle 2            | Cycle 3            |                    |
| <b>ABO 1500 U</b>         |                         |                    |                    |                    |                    |
| Mean (range)              | 145.6<br>(100–300)      | 140.9<br>(100–400) | 140.5<br>(100–250) | 140.6<br>(60–300)  | 142.6<br>(100–300) |
| n (%)                     | 105 (82.0)              | 305 (91.0)         | 210 (90.5)         | 174 (92.1)         | 114 (96.6)         |
| <b>Soleus</b>             |                         |                    |                    |                    |                    |
| <b>ABO 1000 U</b>         |                         |                    |                    |                    |                    |
| Mean (range)              | 333.3<br>(333–333)      | 416.7<br>(333–500) | 387.2<br>(333–500) | 351.8<br>(313–500) | 349.2<br>(333–500) |
| n (%)                     | 127 (100.0)             | 10 (100.0)         | 65 (100.0)         | 35 (100.0)         | 21 (100.0)         |
| <b>ABO 1500 U</b>         |                         |                    |                    |                    |                    |
| Mean (range)              | 495.3<br>(0–500)        | 499.6<br>(400–521) | 500.0<br>(500–507) | 496.6<br>(300–500) | 499.2<br>(400–500) |
| n (%)                     | 128 (100.0)             | 335 (100.0)        | 232 (100.0)        | 189 (100.0)        | 118 (100.0)        |
| <b>Tibialis posterior</b> |                         |                    |                    |                    |                    |
| <b>ABO 1000 U</b>         |                         |                    |                    |                    |                    |
| Mean (range)              | 196.8<br>(67–467)       | 152.4<br>(67–200)  | 174.5<br>(67–333)  | 179.3<br>(125–267) | 159.0<br>(100–267) |
| n (%)                     | 95 (74.8)               | 7 (70.0)           | 34 (52.3)          | 23 (65.7)          | 13 (61.9)          |

| Muscle group                    | Dose injected (U)  |                    |                    |                   |                    |
|---------------------------------|--------------------|--------------------|--------------------|-------------------|--------------------|
|                                 | Double-blind       | Open-label         |                    |                   |                    |
| Dose Group/statistic            |                    | Cycle 1            | Cycle 2            | Cycle 3           | Cycle 4            |
| <b>ABO 1500 U</b>               |                    |                    |                    |                   |                    |
| Mean (range)                    | 284.3<br>(100–700) | 289.3<br>(100–700) | 308.7<br>(100–700) | 242.1<br>(40–700) | 235.4<br>(100–700) |
| n (%)                           | 91 (71.1)          | 251 (74.9)         | 189 (81.5)         | 131 (69.3)        | 92 (78.0)          |
| <b>Toe flexor muscle groups</b> |                    |                    |                    |                   |                    |
| <b>Flexor digitorum longus</b>  |                    |                    |                    |                   |                    |
| <b>ABO 1000 U</b>               |                    |                    |                    |                   |                    |
| Mean (range)                    | 136.7<br>(67–267)  | 141.7<br>(100–200) | 141.8<br>(67–267)  | 132.0<br>(67–333) | 136.7<br>(67–267)  |
| n (%)                           | 90 (70.9)          | 4 (40.0)           | 44 (67.7)          | 22 (62.9)         | 18 (85.7)          |
| <b>ABO 1500 U</b>               |                    |                    |                    |                   |                    |
| Mean (range)                    | 220.9<br>(40–400)  | 203.4<br>(50–500)  | 191.6<br>(100–500) | 173.4<br>(80–400) | 166.8<br>(100–400) |
| n (%)                           | 88 (68.8)          | 246 (73.4)         | 154 (66.4)         | 102 (54.0)        | 60 (50.8)          |
| <b>Flexor digitorum brevis</b>  |                    |                    |                    |                   |                    |
| <b>ABO 1000 U</b>               |                    |                    |                    |                   |                    |
| Mean (range)                    | 89.4<br>(53–133)   | –                  | 93.9<br>(40–133)   | 85.8<br>(33–133)  | 77.8<br>(33–133)   |

| Muscle group                  | Dose injected (U) |                   |                   |                   |                   |
|-------------------------------|-------------------|-------------------|-------------------|-------------------|-------------------|
|                               | Double-blind      | Open-label        |                   |                   |                   |
| Dose Group/statistic          |                   | Cycle 1           | Cycle 2           | Cycle 3           | Cycle 4           |
| n (%)                         | 34 (26.8)         | 0                 | 12 (18.5)         | 8 (22.9)          | 3 (14.3)          |
| <b>ABO 1500 U</b>             |                   |                   |                   |                   |                   |
| Mean (range)                  | 140.8<br>(50–300) | 129.5<br>(50–200) | 132.0<br>(50–300) | 121.2<br>(60–200) | 114.8<br>(80–200) |
| n (%)*                        | 38 (29.7)         | 92 (27.5)         | 61 (26.3)         | 34 (18.0)         | 21 (17.8)         |
| <b>Flexor hallucis longus</b> |                   |                   |                   |                   |                   |
| <b>ABO 1000 U</b>             |                   |                   |                   |                   |                   |
| Mean (range)                  | 96.4<br>(53–267)  | 66.7<br>(67–67)   | 109.1<br>(53–200) | 109.0<br>(67–133) | 108.3<br>(67–133) |
| n (%)                         | 46 (36.2)         | 2 (20.0)          | 11 (16.9)         | 8 (22.9)          | 4 (19.0)          |
| <b>ABO 1500 U</b>             |                   |                   |                   |                   |                   |
| Mean (range)                  | 158.6<br>(60–300) | 155.4<br>(60–340) | 153.3<br>(80–300) | 138.6<br>(75–200) | 131.7<br>(60–200) |
| n (%)*                        | 44 (34.4)         | 118 (35.2)        | 78 (33.6)         | 33 (17.5)         | 23 (19.5)         |
| <b>Flexor hallucis brevis</b> |                   |                   |                   |                   |                   |
| <b>ABO 1000 U</b>             |                   |                   |                   |                   |                   |
| Mean (range)                  | 93.3 (67–<br>133) | –                 | 53.3 (27–67)      | 54.0 (33–67)      | 55.6 (33–67)      |

| Muscle group                      | Dose injected (U)  |                    |                    |                   |                    |
|-----------------------------------|--------------------|--------------------|--------------------|-------------------|--------------------|
|                                   | Double-blind       | Open-label         |                    |                   |                    |
| Dose Group/statistic              |                    | Cycle 1            | Cycle 2            | Cycle 3           | Cycle 4            |
| n (%)                             | 20 (15.7)          | 0                  | 4 (6.2)            | 4 (11.4)          | 3 (14.3)           |
| <b>ABO 1500 U</b>                 |                    |                    |                    |                   |                    |
| Mean (range)                      | 107.9<br>(50–200)  | 117.0<br>(50–300)  | 109.3<br>(50–200)  | 97.1<br>(60–200)  | 92.2<br>(40–150)   |
| n (%)*                            | 19 (14.8)          | 57 (17.0)          | 40 (17.2)          | 17 (9.0)          | 9 (7.6)            |
| <b>Knee extensor muscle group</b> |                    |                    |                    |                   |                    |
| <b>Rectus femoris</b>             |                    |                    |                    |                   |                    |
| <b>ABO 1000 U</b>                 |                    |                    |                    |                   |                    |
| Mean (range)                      | 210.1<br>(67–467)  | 213.3<br>(133–333) | 237.6<br>(100–333) | 225.0<br>(67–333) | 257.3<br>(133–333) |
| n (%)                             | 63 (49.6)          | 5 (50.0)           | 28 (43.1)          | 16 (45.7)         | 10 (47.6)          |
| <b>ABO 1500 U</b>                 |                    |                    |                    |                   |                    |
| Mean (range)                      | 350.0<br>(100–700) | 311.9<br>(100–700) | 291.0<br>(100–700) | 248.8<br>(80–500) | 243.0<br>(180–500) |
| n (%)*                            | 50 (39.1)          | 142 (42.4)         | 84 (36.2)          | 49 (25.9)         | 20 (16.9)          |
| <b>Hip extensor muscle groups</b> |                    |                    |                    |                   |                    |
| <b>Hamstrings</b>                 |                    |                    |                    |                   |                    |

| Muscle group                      | Dose injected (U)  |                    |                    |                    |                    |
|-----------------------------------|--------------------|--------------------|--------------------|--------------------|--------------------|
|                                   | Double-blind       | Open-label         |                    |                    |                    |
| Dose Group/statistic              |                    | Cycle 1            | Cycle 2            | Cycle 3            | Cycle 4            |
| <b>Dysport 1000 U</b>             |                    |                    |                    |                    |                    |
| Mean (range)                      | 195.8<br>(67–333)  | 175.0<br>(100–267) | 207.7<br>(100–333) | 183.3<br>(100–467) | 233.3<br>(200–333) |
| n (%)                             | 16 (12.6)          | 4 (40.0)           | 13 (20.0)          | 10 (28.6)          | 4 (19.0)           |
| <b>ABO 1500 U</b>                 |                    |                    |                    |                    |                    |
| Mean (range)                      | 306.3<br>(100–550) | 305.8<br>(100–700) | 333.6<br>(81–700)  | 283.3<br>(100–700) | 253.8<br>(100–700) |
| n (%)*                            | 24 (18.8)          | 65 (19.4)          | 53 (22.8)          | 24 (12.7)          | 13 (11.0)          |
| <b>Gluteus maximus</b>            |                    |                    |                    |                    |                    |
| <b>ABO 1000 U</b>                 |                    |                    |                    |                    |                    |
| Mean (range)                      | 100.0<br>(67–133)  | –                  | 133.3<br>(133–133) | –                  | –                  |
| n (%)                             | 2 (1.6)            | 0                  | 1 (1.5)            | 0                  | 0                  |
| <b>ABO 1500 U</b>                 |                    |                    |                    |                    |                    |
| Mean (range)                      | 220.0<br>(100–400) | 193.7<br>(81–400)  | 233.3<br>(200–300) | 200.0<br>(200–200) | –                  |
| n (%)*                            | 5 (3.9)            | 11 (3.3)           | 3 (1.3)            | 2 (1.1)            | 0                  |
| <b>Hip adductor muscle groups</b> |                    |                    |                    |                    |                    |

| Muscle group           | Dose injected (U)       |                    |                    |                    |                    |
|------------------------|-------------------------|--------------------|--------------------|--------------------|--------------------|
|                        | Dose<br>Group/statistic | Double-<br>blind   | Open-label         |                    |                    |
| Cycle 1                |                         |                    | Cycle 2            | Cycle 3            |                    |
| <b>Adductor magnus</b> |                         |                    |                    |                    |                    |
| <b>ABO 1000 U</b>      |                         |                    |                    |                    |                    |
| Mean (range)           | 183.3<br>(133–267)      | –                  | 266.7<br>(267–267) | 66.7<br>(67–67)    | –                  |
| n (%)                  | 8 (6.3)                 | 0                  | 1 (1.5)            | 1 (2.9)            | 0                  |
| <b>ABO 1500 U</b>      |                         |                    |                    |                    |                    |
| Mean (range)           | 257.1<br>(200–400)      | 252.3<br>(100–400) | 219.1<br>(100–400) | 242.9<br>(100–500) | 222.2<br>(100–400) |
| n (%)*                 | 7 (5.5)                 | 23 (6.9)           | 22 (9.5)           | 14 (7.4)           | 9 (7.6)            |
| <b>Gracilis</b>        |                         |                    |                    |                    |                    |
| <b>ABO 1000 U</b>      |                         |                    |                    |                    |                    |
| Mean (range)           | 111.1<br>(67–133)       | –                  | 133.3<br>(67–200)  | –                  | –                  |
| n (%)                  | 3 (2.4)                 | 0                  | 2 (3.1)            | 0                  | 0                  |
| <b>ABO 1500 U</b>      |                         |                    |                    |                    |                    |
| Mean (range)           | 183.3<br>(100–200)      | 181.8<br>(100–200) | 158.3<br>(100–200) | 171.4<br>(100–200) | 160.0<br>(100–200) |
| n (%)*                 | 6 (4.7)                 | 11 (3.3)           | 12 (5.2)           | 7 (3.7)            | 5 (4.2)            |

\*n(%), number and percent of subjects receiving injection in the indicated muscle within each dose group. Includes subjects who received ABO 1000U in the lower limb and 500U in the upper limb during cycles 3 (98 subjects) and 4 (67 subjects). Abbreviation: ABO = abobotulinumtoxinA.

**Table e-2. Additional efficacy endpoints for the double-blind phase (ITT population)**

| <b>Efficacy parameters</b>                     | <b>Placebo<br/>(n = 128)</b> | <b>ABO 1000U<br/>(n = 125)</b> | <b>ABO 1500U<br/>(n = 128)</b> |
|------------------------------------------------|------------------------------|--------------------------------|--------------------------------|
| <b>PGA planned analysis</b>                    |                              |                                |                                |
| LS mean (95% CI)*                              | 0.7 (0.5,0.9)                | 0.9 (0.7,1.1)                  | 0.9 (0.7, 1.1)                 |
| <i>p</i> value versus placebo                  | –                            | 0.0640                         | 0.0665                         |
| <b>PGA ranked analysis (<i>post-hoc</i>)</b>   |                              |                                |                                |
| LS mean†                                       | 0.6                          | 0.8                            | 0.8                            |
| <i>p</i> value versus placebo                  | –                            | 0.0466                         | 0.0406                         |
| <b>Comfortable barefoot walking speed, m/s</b> |                              |                                |                                |
| Baseline mean (SD)                             | 0.45 (0.20)                  | 0.44 (0.23)                    | 0.47 (0.22)                    |
| Week 4 mean (SD)                               | 0.50 (0.23)                  | 0.49 (0.27)                    | 0.52 (0.23)                    |
| LS mean (95% CI)                               | 0.05 (0.03, 0.07)            | 0.05 (0.03, 0.07)              | 0.04 (0.03, 0.06)              |
| <i>p</i> value versus placebo                  | –                            | 0.7247                         | 0.7266                         |



| <b>Efficacy parameters</b>    | <b>Placebo<br/>(n = 128)</b> | <b>ABO 1000U<br/>(n = 125)</b> | <b>ABO 1500U<br/>(n = 128)</b> |
|-------------------------------|------------------------------|--------------------------------|--------------------------------|
| Week 12 mean (SD)             | 0.49 (0.23)                  | 0.51 (0.28)                    | 0.54 (0.24)                    |
| LS mean (95% CI)              | 0.05 (0.03, 0.07)            | 0.07 (0.05, 0.09)              | 0.06 (0.04, 0.08)              |
| <i>p</i> value versus placebo | –                            | 0.2056                         | 0.7612                         |
| <b>MAS soleus score</b>       |                              |                                |                                |
| Baseline mean (SD)            | 3.4 (0.8)                    | 3.4 (0.7)                      | 3.2 (0.9)                      |
| Week 4 mean (SD)              | 2.9 (1.1)                    | 2.8 (1.1)                      | 2.5 (1.1)                      |
| LS mean (95% CI) <sup>‡</sup> | -0.4 (-0.6, -0.3)            | -0.7 (-0.8, -0.5)              | -0.8 (-1.0, -0.7)              |
| <i>p</i> value versus placebo | –                            | 0.0389                         | 0.0008                         |
| Week 12 mean (SD)             | 3.1 (0.9)                    | 2.9 (1.0)                      | 2.8 (1.0)                      |
| LS mean (95% CI) <sup>‡</sup> | -0.3 (-0.6, -0.1)            | -0.5 (-0.7, -0.4)              | -0.6 (-0.7, -0.4)              |
| <i>p</i> value versus placebo | –                            | 0.0197                         | 0.0067                         |

LS means for each treatment group and treatment comparisons, as well as the *p* values, were obtained from: \*an analysis of variance on visit results with treatment, botulinum toxin treatment status at

baseline, and center as covariates; †an analysis of variance on visit results based on ranked values with treatment, botulinum toxin treatment status at baseline, and center as covariates; ‡an analysis of covariance on the change from baseline with treatment, baseline score, botulinum toxin treatment status at baseline, and center as covariates.

Abbreviations: ABO = abobotulinumtoxinA; CI = confidence interval; LS = least squares; MAS = Modified Ashworth Scale; PGA = Physician's Global Assessment; SD = standard deviation.

**Table e-3. Passive range of motion ( $X_{V1}$ ), angle of catch ( $X_{V3}$ ), active ankle dorsiflexion ( $X_A$ ) and spasticity grade ( $Y$ ) in the GSC and soleus across cycles at baseline and week 4 of each cycle**

| <b>Tardieu Scale and active ankle dorsiflexion</b> |                     |               |                   |                |                |                |
|----------------------------------------------------|---------------------|---------------|-------------------|----------------|----------------|----------------|
|                                                    | <b>Double-blind</b> |               | <b>Open-label</b> |                |                |                |
|                                                    | <b>Baseline</b>     | <b>Week 4</b> | <b>Cycle 1</b>    | <b>Cycle 2</b> | <b>Cycle 3</b> | <b>Cycle 4</b> |
|                                                    | <b>GSC</b>          |               |                   |                |                |                |
| <b>ABO, all doses (LL)</b>                         | n = 224             | n = 224       | n = 341           | n = 290        | n = 218        | n = 135        |
| Mean $X_{V1}$ (SD)                                 | 87.3 (9.5)          | 88.9 (8.9)    | 90.3 (8.7)        | 89.9 (8.6)     | 89.2 (9.2)     | 89.3 (8.6)     |
| Mean change from baseline (SD)                     | –                   | 1.6 (7.1)     | 2.7 (7.9)         | 2.4 (7.8)      | 2.6 (8.9)      | 2.7 (8.4)      |
| Mean $X_{V3}$ (SD)                                 | 72.2 (11.9)         | 77.0 (10.3)   | 79.6 (10.0)       | 79.6 (10.3)    | 79.7 (10.6)    | 80.7 (10.2)    |
| Mean change from baseline (SD)                     | –                   | 4.7 (8.3)     | 7.1 (10.6)        | 7.3 (11.1)     | 7.9 (12.2)     | 9.5 (12.4)     |

| <b>Tardieu Scale and active ankle dorsiflexion</b> |                     |               |                   |                |                |                |
|----------------------------------------------------|---------------------|---------------|-------------------|----------------|----------------|----------------|
|                                                    | <b>Double-blind</b> |               | <b>Open-label</b> |                |                |                |
|                                                    | <b>Baseline</b>     | <b>Week 4</b> | <b>Cycle 1</b>    | <b>Cycle 2</b> | <b>Cycle 3</b> | <b>Cycle 4</b> |
| Mean X <sub>A</sub> (SD)                           | 69.1 (14.3)         | 72.4 (13.6)   | 73.5 (13.3)       | 73.5 (13.7)    | 73.7 (12.5)    | 74.9 (11.6)    |
| Mean change from baseline (SD)                     | –                   | 3.3 (10.2)    | 4.1 (10.6)        | 4.4 (10.6)     | 6.0 (11.4)     | 6.5 (10.9)     |
| Mean spasticity grade Y (SD)                       | 2.6 (0.7)           | 2.3 (0.6)     | 2.1 (0.6)         | 2.1 (0.6)      | 2.1 (0.6)      | 2.1 (0.6)      |
| Mean change from baseline (SD)                     | –                   | –0.3 (0.7)    | –0.5 (0.8)        | –0.5 (0.7)     | –0.5 (0.7)     | –0.5 (0.8)     |
| <b>Soleus</b>                                      |                     |               |                   |                |                |                |
| <b>ABO, all doses (LL)</b>                         | n = 224             | n = 224       | n = 341           | n = 290        | n = 218        | n = 135        |
| Mean X <sub>v1</sub> (SD)                          | 95.1 (9.4)          | 96.8 (8.9)    | 97.0 (9.1)        | 97.5 (9.6)     | 96.8 (9.2)     | 96.5 (9.2)     |
| Mean change from baseline (SD)                     | –                   | 1.7 (6.3)     | 1.9 (8.0)         | 2.8 (8.1)      | 2.6 (8.5)      | 2.4 (8.6)      |

| <b>Tardieu Scale and active ankle dorsiflexion</b> |                     |               |                   |                |                |                |
|----------------------------------------------------|---------------------|---------------|-------------------|----------------|----------------|----------------|
|                                                    | <b>Double-blind</b> |               | <b>Open-label</b> |                |                |                |
|                                                    | <b>Baseline</b>     | <b>Week 4</b> | <b>Cycle 1</b>    | <b>Cycle 2</b> | <b>Cycle 3</b> | <b>Cycle 4</b> |
| Mean X <sub>V3</sub> (SD)                          | 79.6 (10.3)         | 84.4 (9.3)    | 86.1 (9.9)        | 86.6 (9.8)     | 86.6 (9.8)     | 87.2 (9.9)     |
| Mean change from baseline (SD)                     | –                   | 4.7 (8.1)     | 6.9 (10.3)        | 7.5 (10.8)     | 7.8 (11.2)     | 8.8 (11.4)     |
| Mean X <sub>A</sub> (SD)                           | 79.5 (13.8)         | 83.0 (12.4)   | 83.6 (12.8)       | 84.3 (12.1)    | 84.1 (12.4)    | 83.3 (11.9)    |
| Mean change from baseline (SD)                     | –                   | 3.5 (9.0)     | 4.1 (10.7)        | 5.0 (10.3)     | 5.2 (10.9)     | 3.8 (9.8)      |
| Mean spasticity grade Y (SD)                       | 2.8 (0.7)           | 2.3 (0.7)     | 2.1 (0.8)         | 2.1 (0.6)      | 2.1 (0.6)      | 2.1 (0.5)      |
| Mean change from baseline (SD)                     | –                   | -0.4 (0.7)    | -0.6 (0.8)        | -0.6 (0.7)     | -0.7 (0.8)     | -0.7 (0.7)     |

Baseline refers to baseline of double-blind study, prior to first injection. Abbreviations: ABO = abobotulinumtoxinA; LL = lower limb; X<sub>A</sub> = active range of motion;

X<sub>V1</sub> = angle of arrest; X<sub>V3</sub> = angle of catch.

**Table e-4. Subgroup analysis of abobotulinumtoxinA efficacy by baseline botulinum toxin type A status**

|                      | Placebo    | ABO 1000U  | ABO 1500U  |
|----------------------|------------|------------|------------|
| <b>MAS GSC score</b> |            |            |            |
| BoNT-A naïve         | n = 81     | n = 82     | n = 80     |
| Baseline mean (SD)   | 3.7 (0.5)  | 3.6 (0.5)  | 3.6 (0.5)  |
| Week 4 mean (SD)     | 3.3 (0.8)  | 3.2 (0.8)  | 3.0 (0.9)  |
| Mean change (SD)     | -0.4 (0.7) | -0.4 (0.8) | -0.6 (0.8) |
| BoNT-A non-naïve     | n = 47     | n = 43     | n = 48     |
| Baseline mean (SD)   | 4.1 (0.2)  | 4.0 (0.0)  | 4.0 (0.3)  |
| Week 4 mean (SD)     | 3.5 (0.8)  | 3.2 (1.1)  | 3.1 (1.0)  |
| Mean change (SD)     | -0.6 (0.8) | -0.8 (1.1) | -0.9 (1.0) |
| <b>PGA</b>           |            |            |            |
| BoNT-A naïve         | n = 81     | n = 82     | n = 79     |
| Week 4 mean          | 0.7 (0.9)  | 0.9 (1.0)  | 0.9 (1.0)  |
| BoNT-A non-naïve     | n = 47     | n = 42     | n = 46     |
| Week 4 mean          | 0.8 (1.2)  | 1.0 (1.4)  | 0.8 (1.2)  |

**Comfortable barefoot walking speed, m/s**

|                    |               |               |               |
|--------------------|---------------|---------------|---------------|
| BoNT-A naïve       | n = 80        | n = 82        | n = 79        |
| Baseline mean (SD) | 0.434 (0.199) | 0.449 (0.259) | 0.461 (0.221) |
| Week 4 mean (SD)   | 0.487 (0.232) | 0.500 (0.288) | 0.511 (0.238) |
| Mean change (SD)   | 0.053 (0.079) | 0.055 (0.120) | 0.050 (0.097) |
| BoNT-A non-naïve   | n = 47        | n = 43        | n = 48        |
| Baseline mean (SD) | 0.469 (0.211) | 0.409 (0.180) | 0.488 (0.204) |
| Week 4 mean (SD)   | 0.516 (0.236) | 0.461 (0.245) | 0.527 (0.214) |
| Mean change (SD)   | 0.043 (0.085) | 0.053 (0.106) | 0.040 (0.103) |

---

Abbreviations: ABO = abobotulinumtoxinA; BoNT-A = botulinum toxin type A; GSC = gastrocnemius-soleus complex; MAS = Modified Ashworth Scale; PGA = Physician's Global Assessment; SD = standard deviation.

**Table e-5. Subgroup analysis of abobotulinumtoxinA efficacy by cause of spasticity**

|                               | Placebo | ABO 1000U | ABO 1500U |
|-------------------------------|---------|-----------|-----------|
| <b>MAS GSC score</b>          |         |           |           |
| Stroke                        | n = 106 | n = 109   | n = 116   |
| Mean change from BL to week 4 | -0.5    | -0.5      | -0.7      |
| Traumatic brain injury        | n = 22  | n = 16    | n = 12    |
| Mean change from BL to week 4 | -0.6    | -0.8      | -0.7      |
| <b>PGA</b>                    |         |           |           |
| Stroke                        | n = 106 | n = 108   | n = 114   |
| Week 4 mean                   | 0.7     | 0.9       | 0.9       |
| Traumatic brain injury        | n = 22  | n = 16    | n = 11    |
| Week 4 mean                   | 0.6     | 1.2       | 0.7       |

Abbreviations: ABO = abobotulinumtoxinA; BL = baseline; GSC = gastrocnemius–soleus complex;

MAS = Modified Ashworth Scale; PGA = Physician’s Global Assessment.



**Table e-6. 10-metre comfortable barefoot walking speed change from baseline at week 4 versus week 12 across cycles**

| Visit                                                                 | ABO (all doses combined) |                     |
|-----------------------------------------------------------------------|--------------------------|---------------------|
|                                                                       | Week 4                   | Week 12             |
| <b>Number of participants, n</b>                                      |                          |                     |
| Double-blind                                                          | 222                      | 220                 |
| Cycle 1                                                               | 335                      | 316                 |
| Cycle 2                                                               | 285                      | 253                 |
| Cycle 3                                                               | 215                      | 150                 |
| Cycle 4                                                               | 134                      | 138                 |
| <b>Total number of visits, n</b>                                      | 1191                     | 1077                |
| <b>LS mean (standard error)</b>                                       | 0.073 (0.004)            | 0.083 (0.004)       |
| 95% CI of LS mean                                                     | 0.065–0.080              | 0.074–0.091         |
| <b>Difference in LS means<br/>between weeks 4 and 12<br/>(95% CI)</b> | –                        | 0.010 (0.005–0.016) |
| <i>p</i> value                                                        | –                        | 0.0002              |

Abbreviations: ABO = abobotulinumtoxinA; CI = confidence interval; LS = least-squares.

**Table e-7. Correlation between comfortable barefoot walking speed change from baseline and time since event (stroke or TBI in years) at baseline**

| Visit                  | ABO (all doses combined) |         |
|------------------------|--------------------------|---------|
|                        | Week 4                   | Week 12 |
| <b>Double-blind, n</b> | 222                      | 220     |
| Pearson correlation    | -0.09135                 | -0.1114 |
| <i>p</i> value         | 0.1750                   | 0.0993  |
| <b>Cycle 1, n</b>      | 335                      | 316     |
| Pearson correlation    | -0.075                   | -0.0579 |
| <i>p</i> value         | 0.1696                   | 0.3050  |
| <b>Cycle 2, n</b>      | 285                      | 253     |
| Pearson correlation    | -0.1239                  | -0.1514 |
| <i>p</i> value         | 0.0366                   | 0.0160  |
| <b>Cycle 3, n</b>      | 215                      | 150     |
| Pearson correlation    | -0.1220                  | -0.0129 |

---

|                     |         |        |
|---------------------|---------|--------|
| <i>p</i> value      | 0.0743  | 0.8755 |
| <b>Cycle 4, n</b>   | 134     | –      |
| Pearson correlation | –0.0978 | –      |
| <i>p</i> value      | 0.2611  | –      |

---

Abbreviations: ABO = abobotulinumtoxinA; DB = double-blind study; SD = standard deviation.

**Table e-8. Comfortable barefoot walking speed across cycles  
(abobotulinumtoxinA – all doses combined) by time since event (stroke or TBI)**

| Visit                                                   | Comfortable barefoot walking speed, m/s |                                 |                                 |                                 |
|---------------------------------------------------------|-----------------------------------------|---------------------------------|---------------------------------|---------------------------------|
|                                                         | Time since event (stroke or TBI), years |                                 |                                 |                                 |
|                                                         | 0–2                                     | 2–5                             | 5–10                            | >10                             |
| <b>Absolute value at baseline</b>                       | n = 83                                  | n = 70                          | n = 36                          | n = 33                          |
| Mean (SD) [range]                                       | 0.42 (0.23)<br>[0.10–1.24]              | 0.45 (0.20)<br>[0.13–0.85]      | 0.41 (0.21)<br>[0.12–0.80]      | 0.56 (0.23)<br>[0.10–1.14]      |
| <b>Change from baseline to<br/>double-blind week 4</b>  | n = 83                                  | n = 70                          | n = 36                          | n = 33                          |
| Mean (SD) [range]                                       | 0.06 (0.11)<br>[0.39–0.42]              | 0.06 (0.10)<br>[-0.17–<br>0.46] | 0.05 (0.09)<br>[-0.12–<br>0.25] | 0.04 (0.10)<br>[-0.16–<br>0.21] |
| <b>Change from baseline to<br/>double-blind week 12</b> | n = 82                                  | n = 70                          | n = 35                          | n = 33                          |
| Mean (SD) [range]                                       | 0.08 (0.11)<br>[-0.14–<br>0.45]         | 0.07 (0.12)<br>[-0.17–<br>0.56] | 0.06 (0.10)<br>[-0.12<br>0.34]  | 0.05 (0.10)<br>[-0.14–<br>0.23] |
| <b>Change from baseline to<br/>cycle 1 week 4</b>       | n = 116                                 | n = 115                         | n = 54                          | n = 50                          |

|                                                    |                  |                  |                  |                  |
|----------------------------------------------------|------------------|------------------|------------------|------------------|
| Mean (SD) [range]                                  | 0.07 (0.13)      | 0.08 (0.11)      | 0.06 (0.12)      | 0.04 (0.14)      |
|                                                    | [-0.33–<br>0.47] | [-0.14–<br>0.48] | [-0.31–<br>0.52] | [-0.38–<br>0.35] |
| <b>Change from baseline to<br/>cycle 1 week 12</b> | n = 111          | n = 109          | n = 51           | n = 45           |
| Mean (SD) [range]                                  | 0.08 (0.14)      | 0.09 (0.13)      | 0.07 (0.11)      | 0.06 (0.13)      |
|                                                    | [-0.43–<br>0.54] | [-0.16–<br>0.57] | [-0.17–<br>0.51] | [-0.21–<br>0.51] |
| <b>Change from baseline to<br/>cycle 2 week 4</b>  | n = 100          | n = 98           | n = 46           | n = 41           |
| Mean (SD) [range]                                  | 0.10 (0.15)      | 0.08 (0.13)      | 0.04 (0.09)      | 0.05 (0.12)      |
|                                                    | [-0.29–<br>0.55] | [-0.21–<br>0.45] | [-0.17–<br>0.21] | [-0.19–<br>0.37] |
| <b>Change from baseline to<br/>cycle 2 week 12</b> | n = 88           | n = 84           | n = 43           | n = 38           |
| Mean (SD) [range]                                  | 0.12 (0.15)      | 0.09 (0.13)      | 0.06 (0.11)      | 0.05 (0.13)      |
|                                                    | [-0.26–<br>0.59] | [-0.15–<br>0.51] | [-0.09–<br>0.38] | [-0.35–<br>0.40] |
| <b>Change from baseline to<br/>cycle 3 week 4</b>  | n = 78           | n = 69           | n = 35           | n = 33           |

|                                                    |                  |                  |                  |                  |
|----------------------------------------------------|------------------|------------------|------------------|------------------|
| Mean (SD) [range]                                  | 0.11 (0.14)      | 0.07 (0.11)      | 0.04 (0.10)      | 0.05 (0.12)      |
|                                                    | [-0.19–<br>0.55] | [-0.29–<br>0.42] | [-0.15–<br>0.27] | [-0.19–<br>0.35] |
| <b>Change from baseline to<br/>cycle 3 week 12</b> | n = 51           | n = 52           | n = 27           | n = 20           |
| Mean (SD) [range]                                  | 0.12 (0.16)      | 0.06 (0.13)      | 0.07 (0.09)      | 0.10 (0.16)      |
|                                                    | [-0.12–<br>0.56] | [-0.25–<br>0.41] | [-0.05–<br>0.27] | [-0.19–<br>0.48] |
| <b>Change from baseline to<br/>cycle 4 week 4</b>  | n = 46           | n = 51           | n = 21           | n = 16           |
| Mean (SD) [range]                                  | 0.12 (0.17)      | 0.08 (0.13)      | 0.07 (0.10)      | 0.06 (0.15)      |
|                                                    | [-0.14–<br>0.62] | [-0.31–<br>0.42] | [-0.10–<br>0.36] | [-0.31–<br>0.34] |

Abbreviations: SD = standard deviation; TBI = traumatic brain injury.

**Table e-9. Summary of AEs (preferred term) following abobotulinumtoxinA injections reported in  $\geq 2\%$  of participants at any cycle (safety population)**

| Preferred term, n (%)<br>[number of events] |              | Double-blind |         | Open-label |         |
|---------------------------------------------|--------------|--------------|---------|------------|---------|
|                                             |              | Cycle 1      | Cycle 2 | Cycle 3    | Cycle 4 |
| <b>Placebo</b>                              | n = 130      |              |         |            |         |
| Muscular weakness                           | 4 (3.1) [ 4] | –            | –       | –          | –       |
| Pain in extremity                           | 3 (2.5) [ 3] | –            | –       | –          | –       |
| Arthralgia                                  | 1 (0.8) [1]  | –            | –       | –          | –       |
| Fall                                        | 4 (3.3) [ 8] | –            | –       | –          | –       |
| Dysphagia                                   | 1 (0.8) [ 1] | –            | –       | –          | –       |
| Asthenia                                    | 1 (0.8) [ 2] | –            | –       | –          | –       |

| <b>ABO 1000 U (LL)</b> | n = 127       | n = 10        | n = 65        | n = 133     | n = 88      |
|------------------------|---------------|---------------|---------------|-------------|-------------|
| Muscular weakness      | 3 (2.4) [3]   | 1 (10.0) [1]  | 1 (1.5) [1]   | 5 (3.8) [5] | 2 (2.3) [2] |
| Pain in extremity      | 7 (5.5) [7]   | 1 (10.0) [1]  | 2 (3.1) [3]   | 1 (0.8) [1] | –           |
| Arthralgia             | 5 (3.9) [5]   | –             | 1 (1.5) [1]   | 1 (0.8) [1] | 1 (1.1) [1] |
| Fall                   | 12 (9.4) [14] | 1 (10.0) [1]  | 7 (10.8) [8]  | 8 (6.0) [8] | 3 (3.4) [3] |
| Dysphagia              | 2 (1.6) [2]   | –             | –             | 1 (0.8) [1] | 2 (2.3) [2] |
| Asthenia               | 3 (2.4) [3]   | –             | 3 (4.6) [4]   | 4 (3.0) [4] | 1 (1.1) [1] |
| <b>ABO 1500 U (LL)</b> | n = 128       | n = 335       | n = 232       | n = 91      | n = 51      |
| Muscular weakness      | 8 (6.3) [9]   | 21 (6.3) [22] | 11 (4.7) [11] | 1 (1.1) [1] | 1 (2.0) [1] |
| Pain in extremity      | 8 (6.3) [9]   | 10 (3.0) [10] | 2 (0.9) [2]   | 1 (1.1) [1] | –           |
| Arthralgia             | 3 (2.3) [4]   | 6 (1.8) [6]   | 5 (2.2) [6]   | –           | 1 (2.0) [1] |



|           |             |               |               |             |             |
|-----------|-------------|---------------|---------------|-------------|-------------|
| Fall      | 8 (6.3) [9] | 16 (4.8) [17] | 10 (4.3) [11] | 1 (1.1) [1] | 2 (3.9) [3] |
| Dysphagia | 1 (0.8) [1] | 1 (0.3) [1]   | 6 (2.6) [6]   | –           | –           |
| Asthenia  | 1 (0.8) [1] | 9 (2.7) [9]   | 3 (1.3) [3]   | –           | –           |

---

Abbreviations: ABO = abobotulinumtoxinA; LL = lower-limb.

**Table e-10. Correlation between comfortable barefoot walking speed and composite  $X_A$  at week 4 of each cycle (absolute values)**

| Visit                  | Placebo | ABO 1000 U | ABO 1500 U |
|------------------------|---------|------------|------------|
| <b>Baseline, n</b>     | 120     | 112        | 110        |
| Pearson correlation    | 0.2027  | 0.3541     | 0.3105     |
| <i>p</i> value         | 0.0264  | 0.0001     | 0.0010     |
| <b>Double-blind, n</b> | 119     | 111        | 111        |
| Pearson correlation    | 0.2215  | 0.3831     | 0.2538     |
| <i>p</i> value         | 0.0155  | <0.0001    | 0.0072     |
| <b>Cycle 1, n</b>      | –       | 10         | 325        |
| Pearson correlation    | –       | 0.1439     | 0.2188     |
| <i>p</i> value         | –       | 0.6916     | <0.0001    |
| <b>Cycle 2, n</b>      | –       | 63         | 223        |
| Pearson correlation    | –       | 0.0941     | 0.2542     |
| <i>p</i> value         | –       | 0.4633     | 0.0001     |
| <b>Cycle 3, n</b>      | –       | 127        | 88         |
| Pearson correlation    | –       | 0.2261     | 0.1287     |

---

|                     |   |        |        |
|---------------------|---|--------|--------|
| <i>p</i> value      | – | 0.0106 | 0.2321 |
| <b>Cycle 4, n</b>   | – | 83     | 51     |
| Pearson correlation | – | 0.1362 | 0.2744 |
| <i>p</i> value      | – | 0.2197 | 0.0514 |

---

Abbreviations: ABO = abobotulinumtoxinA; X<sub>A</sub> = active range of motion.

## Figure legend

Figure e-1. Passive range of motion ( $X_{V1}$ ), angle of catch ( $X_{V3}$ ) and active ankle dorsiflexion ( $X_A$ ) in the (A) GSC and (B) soleus muscle across cycles: mean change from baseline to week 4 at each cycle (abobotulinumtoxinA doses combined)

(A)

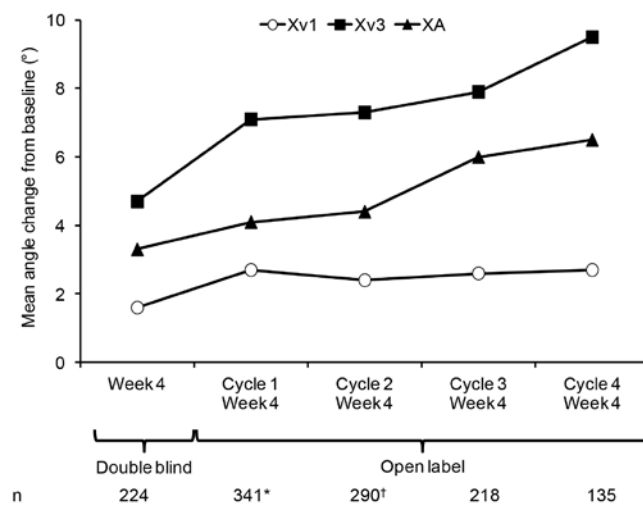

(B)

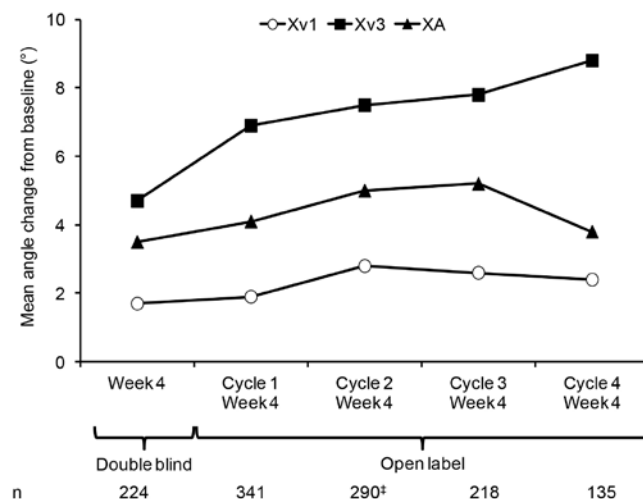

\*340 for  $X_A$ ; †289 for  $X_{V3}$ ; ‡289 for  $X_{V3}$ . Standard deviations are available in Table e-2. GSC, gastrocnemius–soleus complex;  $X_A$ , active range of motion;  $X_{V1}$ , angle of arrest;  $X_{V3}$ , angle of catch
